# Supplementary material
Source: PubMed Central journal article supplement (PMC3767157)
Supplement: NIHMS498775-supplement-02.pdf [file NIHMS498775-supplement-02.pdf]

## Song et al. Figure S1, related to Figs. 1 and 2

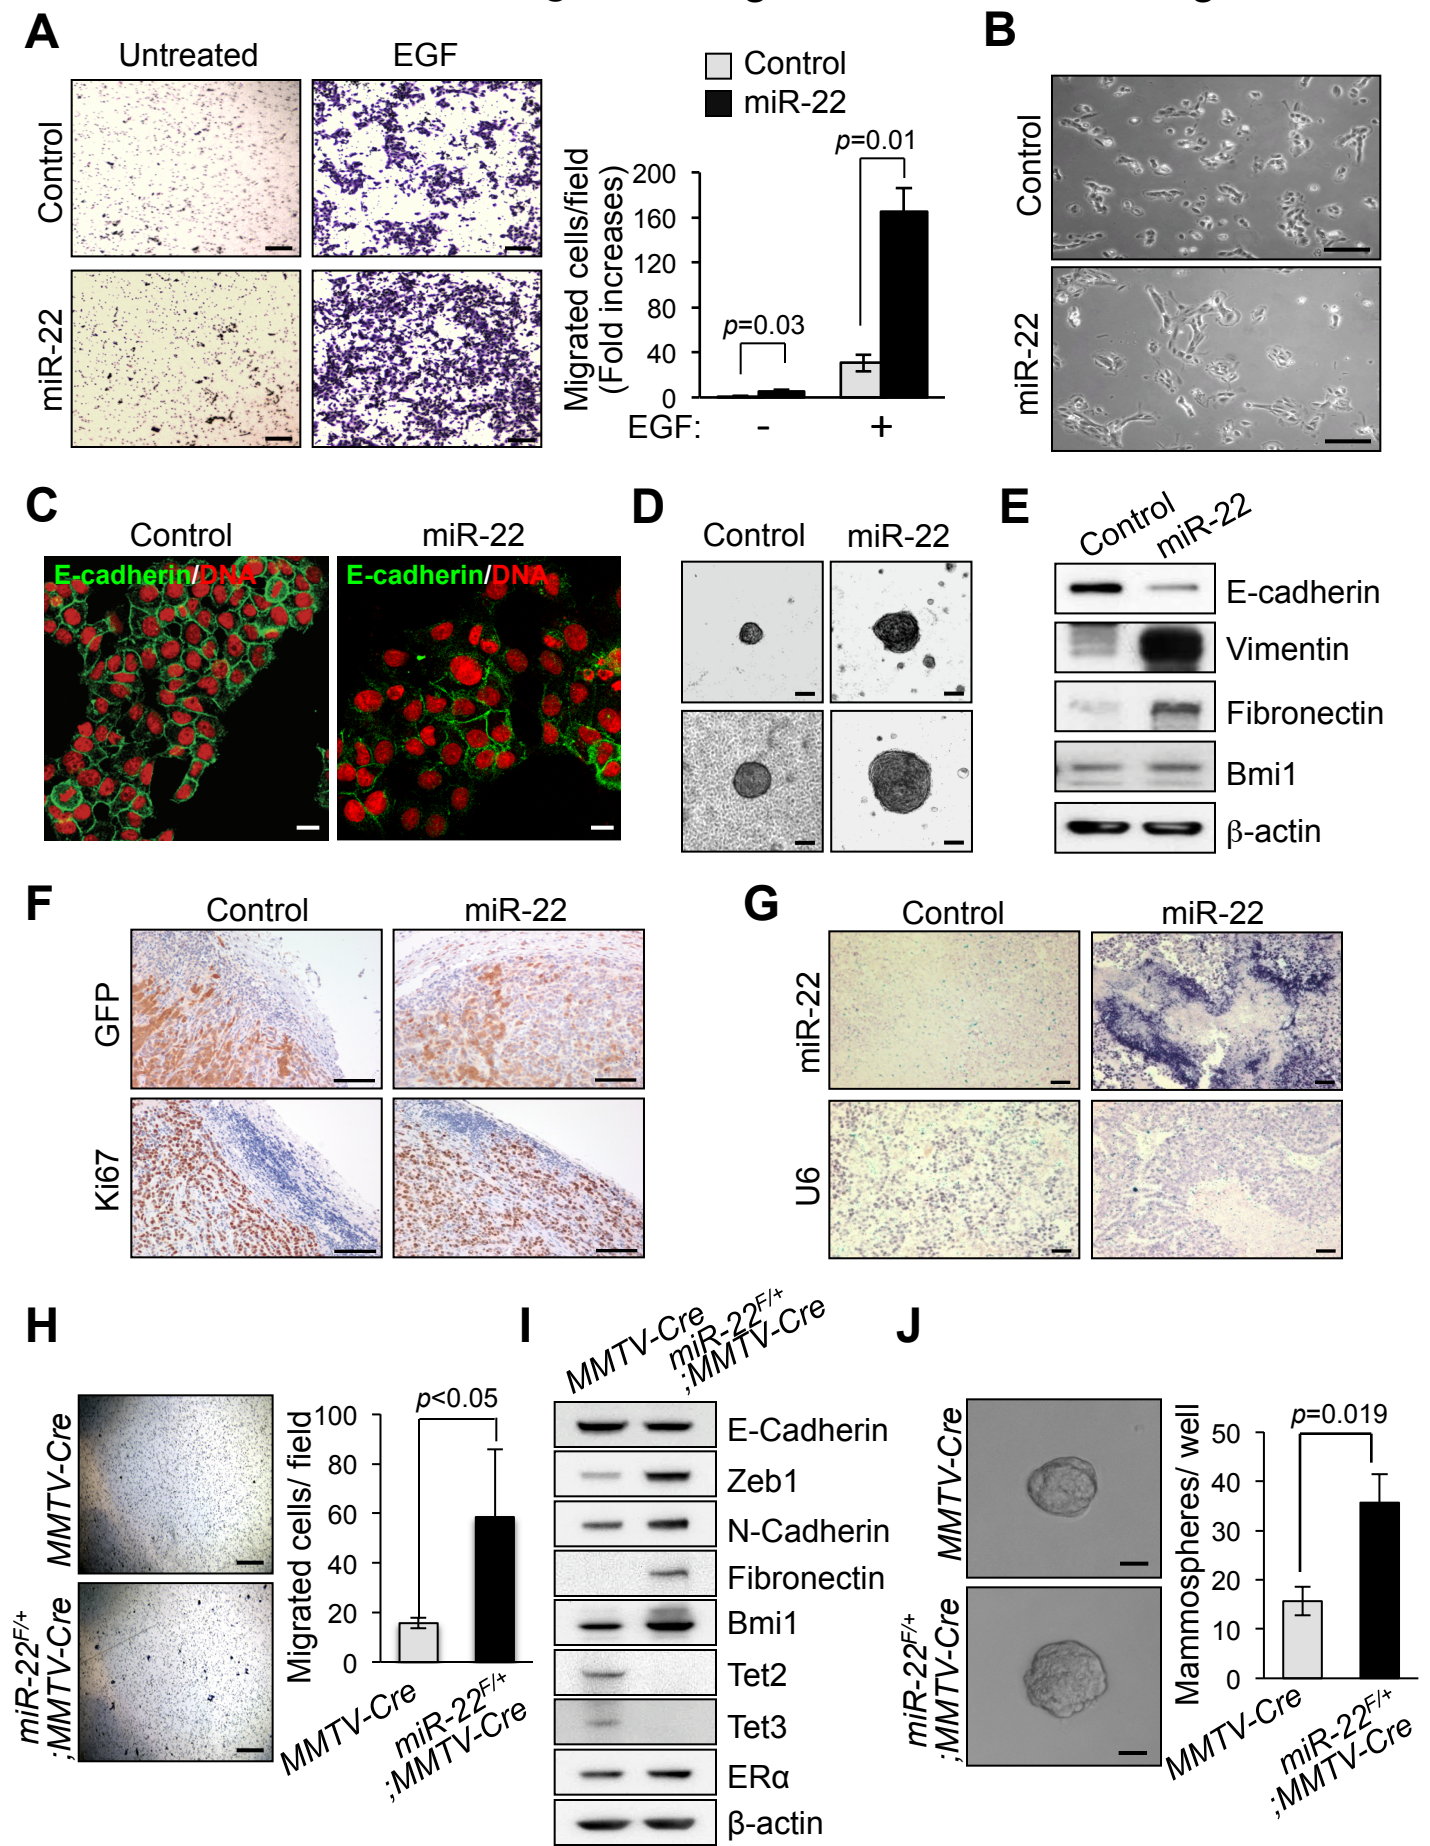

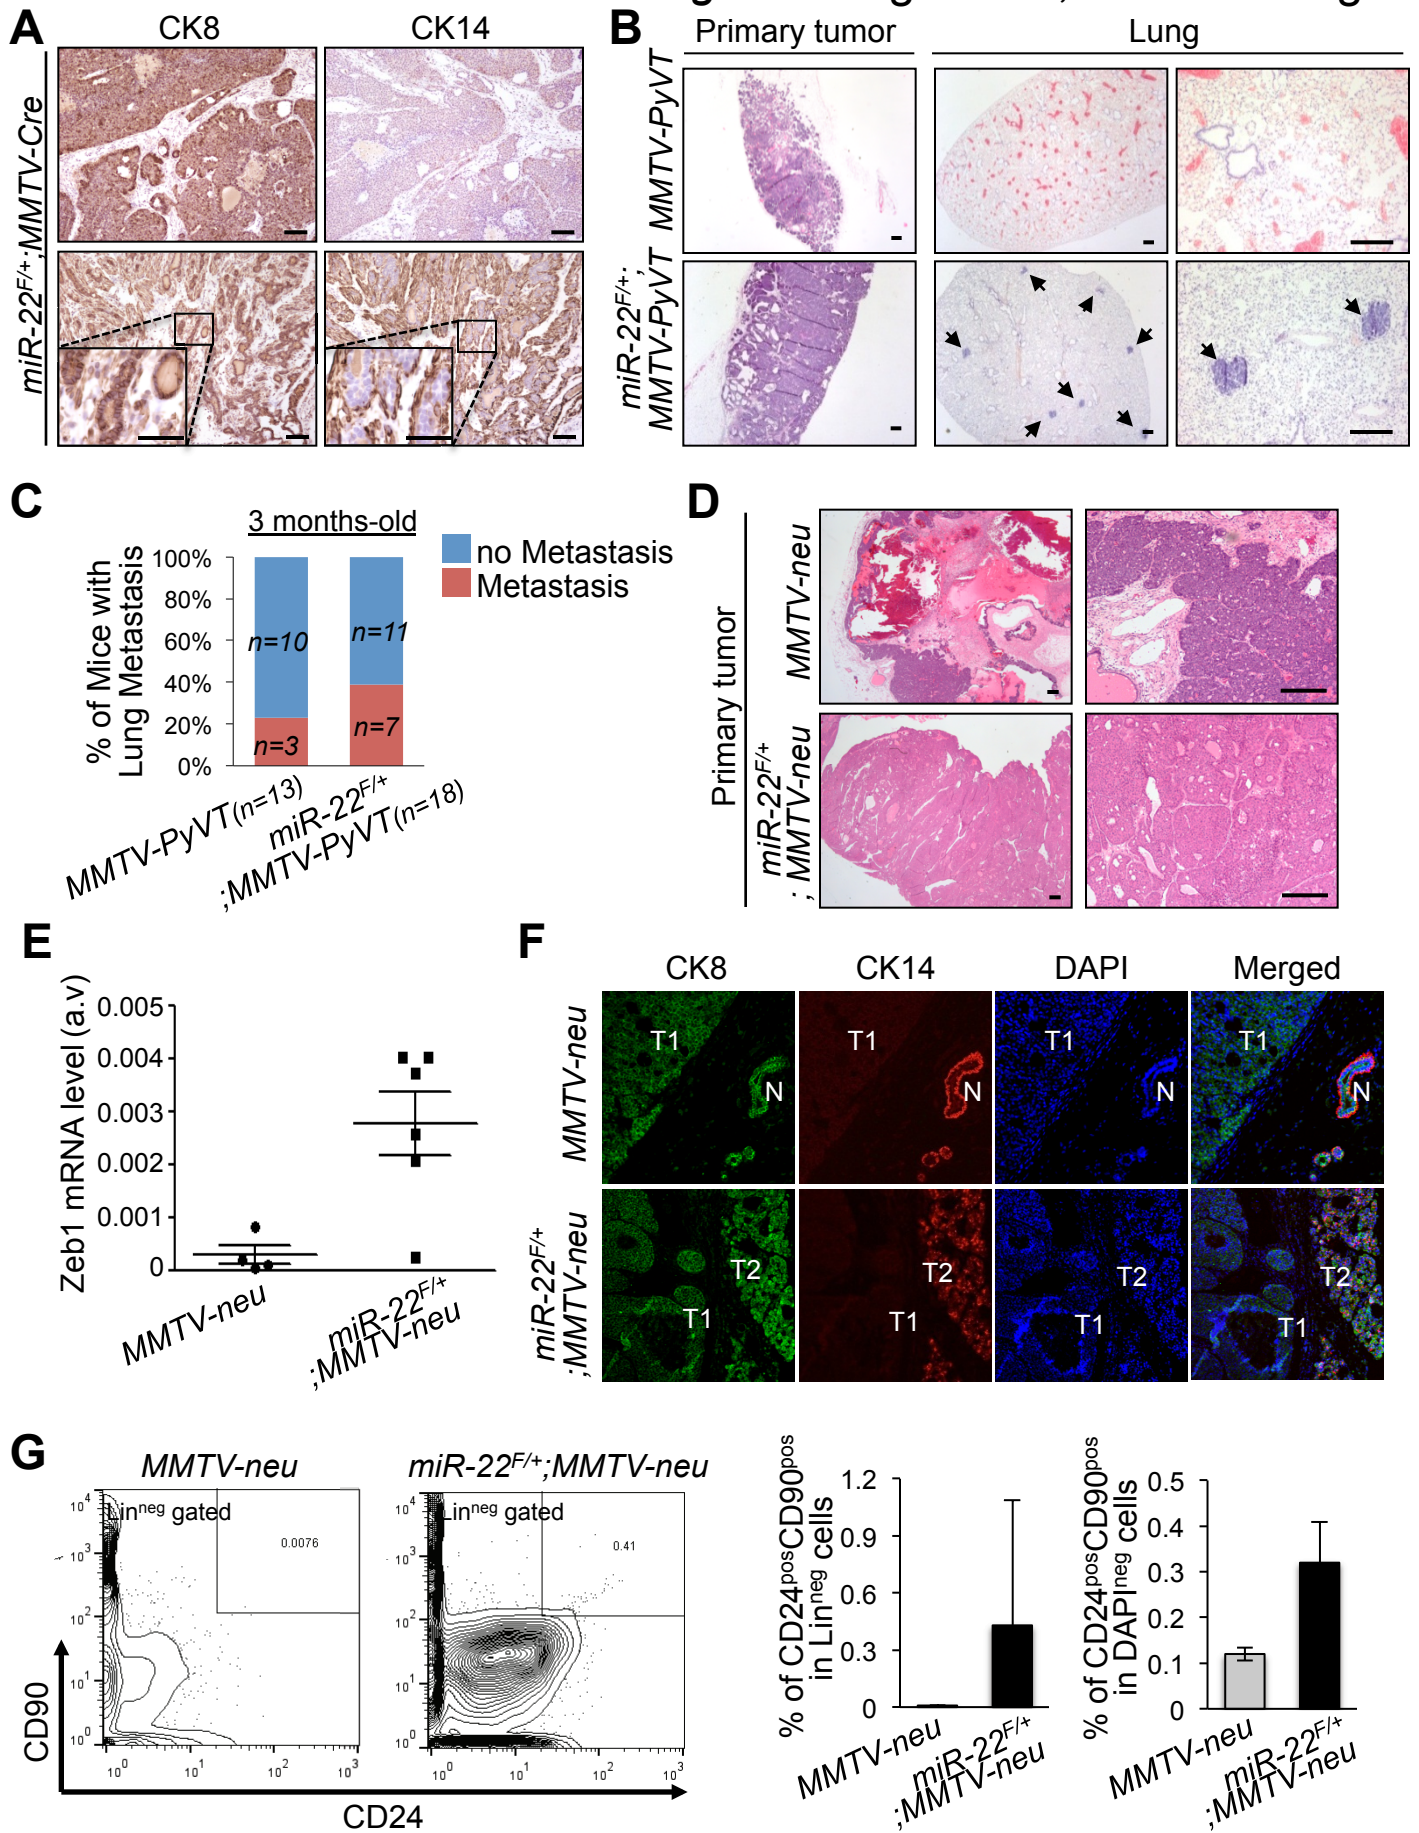

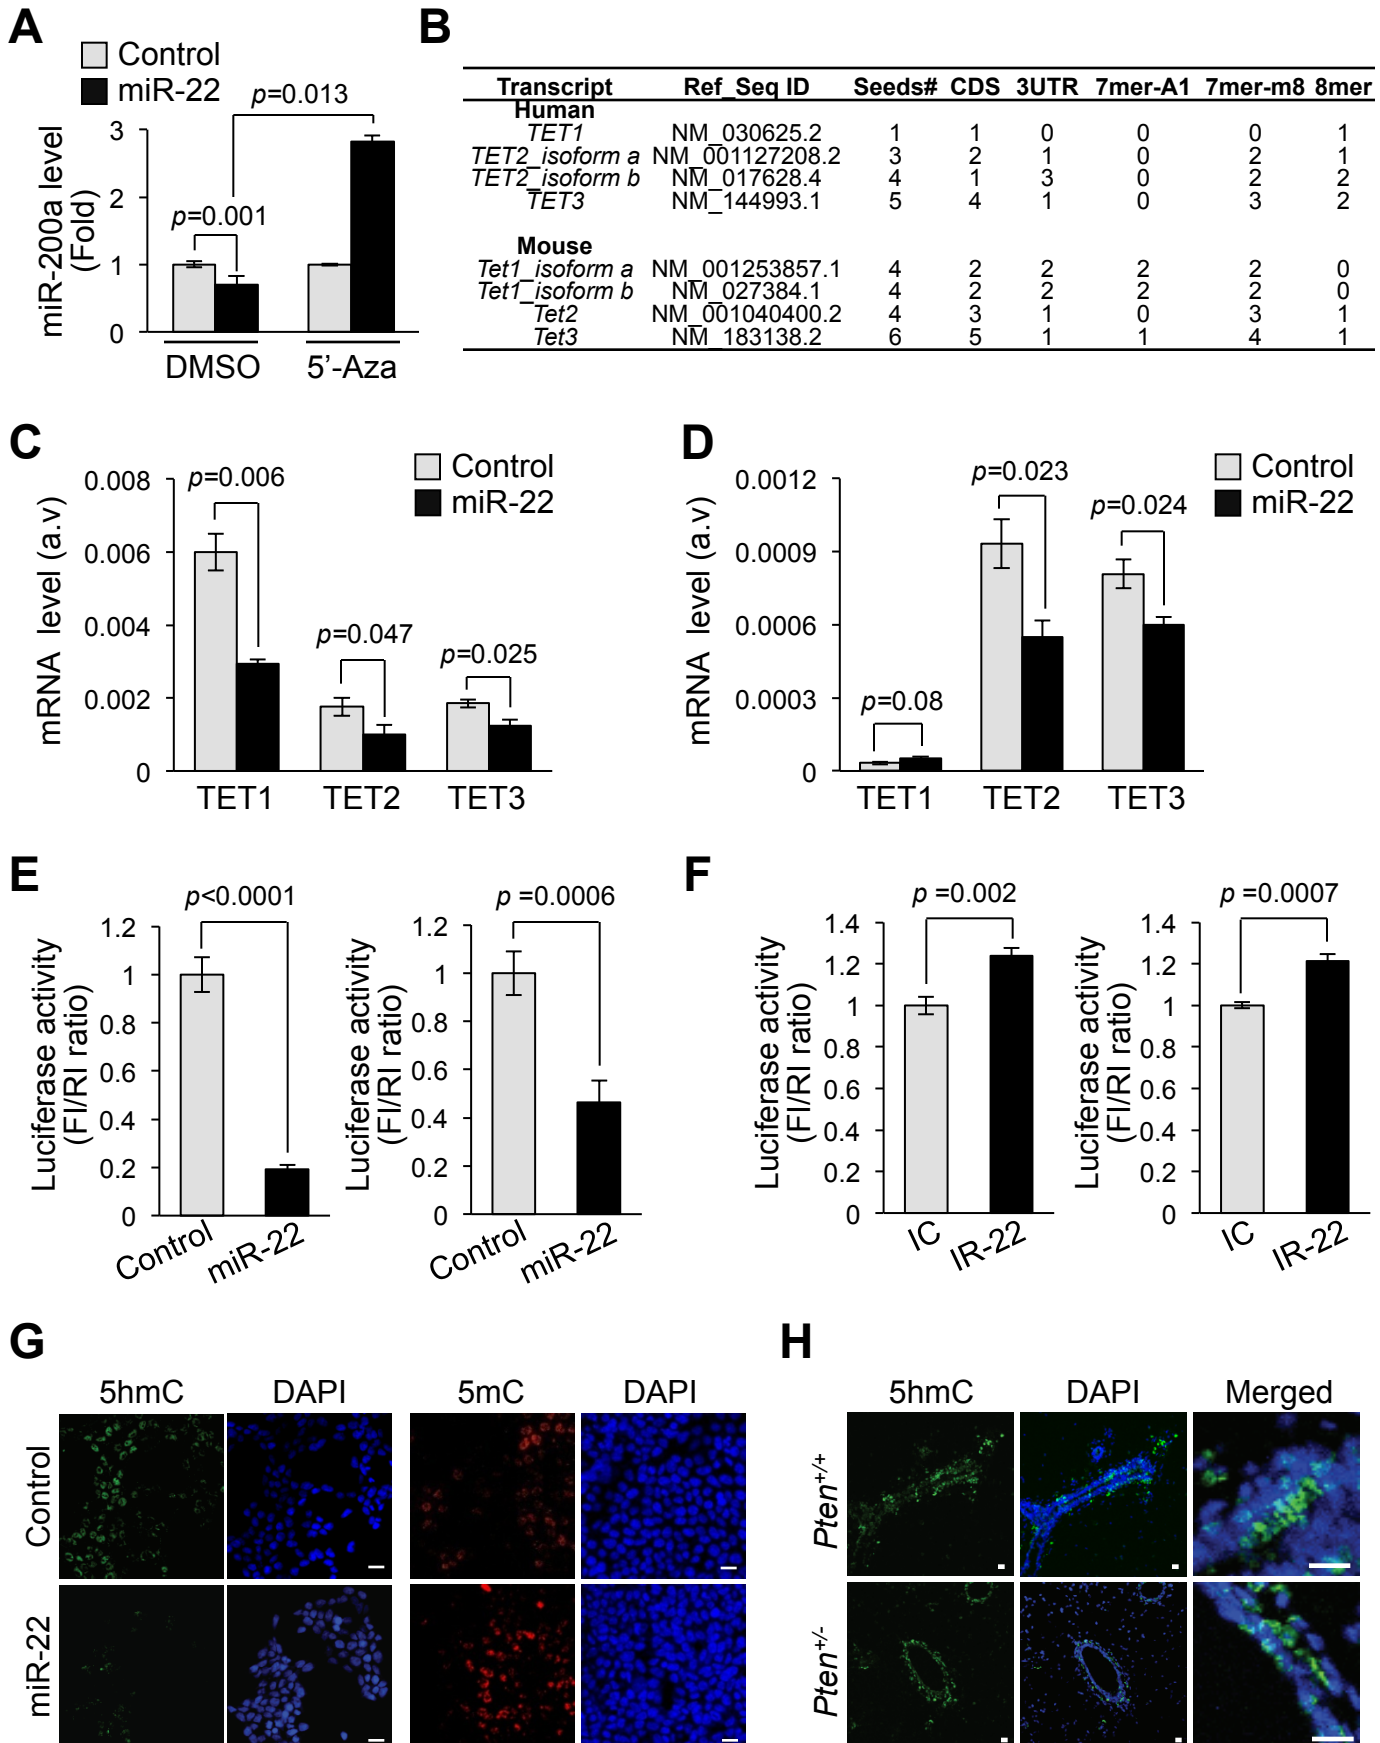

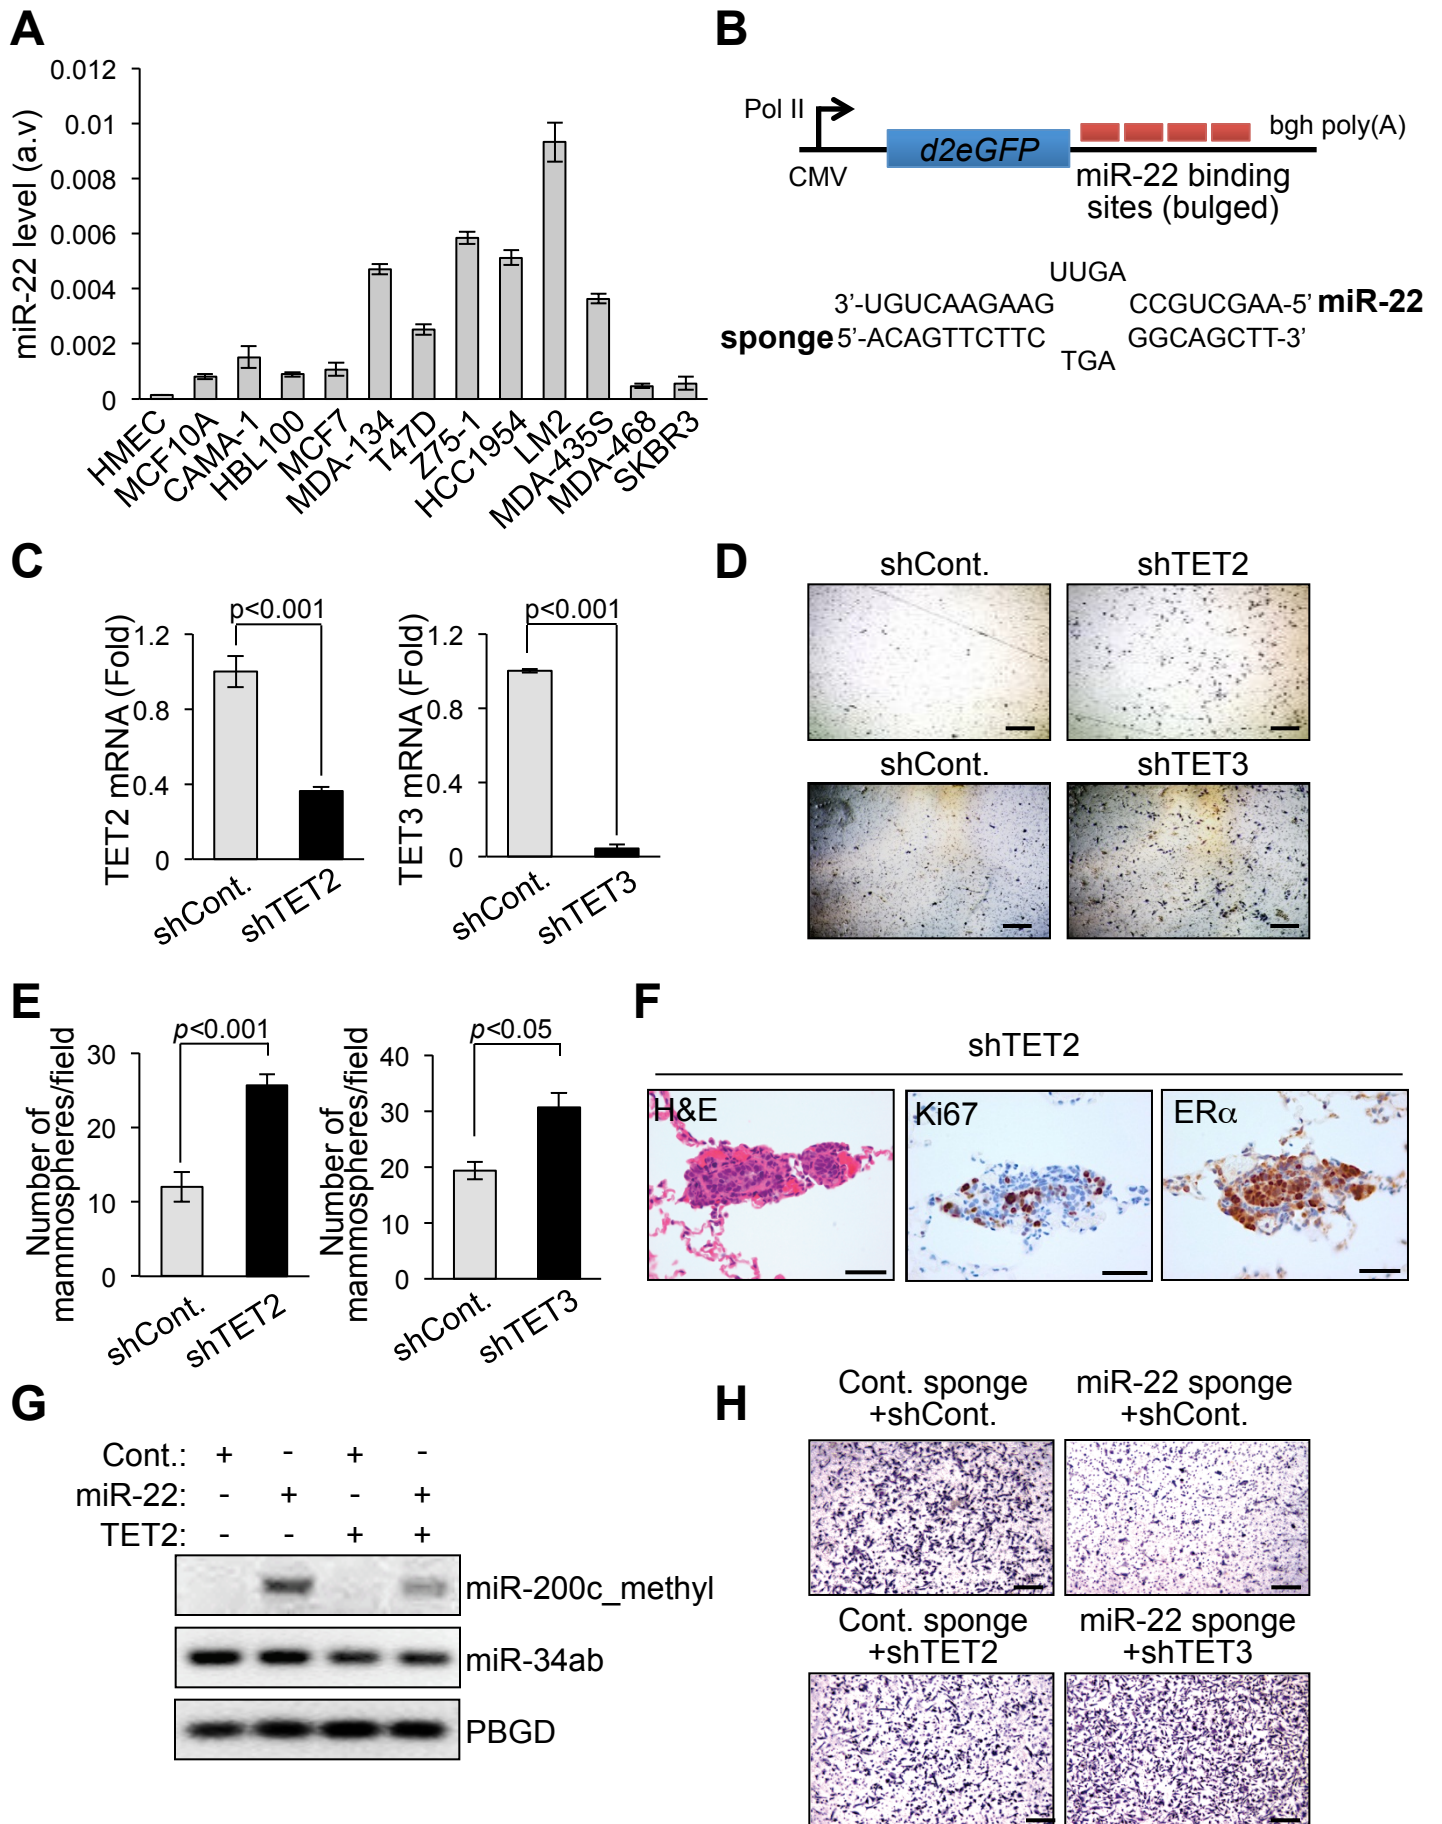

**A**

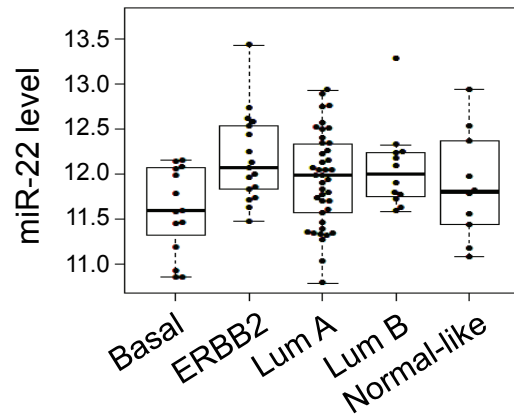

**B**

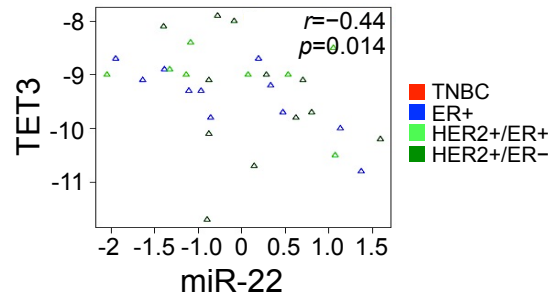

**C**

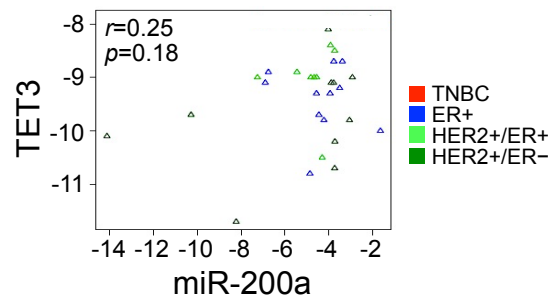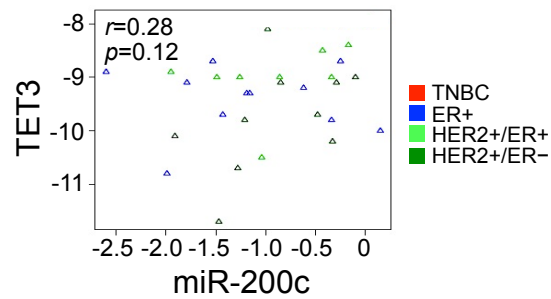

*Song et al.* Table S1, related to Fig. 7

| <b>Gene</b>                                                     | <b>Correlation</b> | <b>P value</b> |
|-----------------------------------------------------------------|--------------------|----------------|
| Sialoadhesion                                                   | 0.555493           | 0.00002        |
| Matrix metalloproteinase11                                      | 0.536375           | 0.00004        |
| Cathepsin B                                                     | 0.499871           | 0.000188       |
| Integrin $\alpha$ 11                                            | 0.424994           | 0.001879       |
| Transforming growth factor, $\beta$ receptor associated protein | 0.415485           | 0.00243        |
| Collagen, type X, $\alpha$ 1                                    | 0.41163            | 0.002691       |
| Transforming growth factor, $\beta$ 1                           | 0.407043           | 0.003033       |
| Fbronectin 1                                                    | 0.402638           | 0.003398       |
| Laminin, $\alpha$ 5                                             | 0.398962           | 0.003732       |
| Matrix metalloproteinase 1                                      | 0.391994           | 0.004444       |
| SMA4                                                            | 0.388556           | 0.004837       |
